# Supplementary material for: One-step facile transformation from rofecoxib to reversible mechanofluorochromic materials with dual-state emission
Source: Royal Society of Chemistry journal article supplement (doi:10.1039/d3nj02402d), 2023-01-01
Supplement: d3nj02402d1.pdf [file d3nj02402d1.pdf]

Supporting Information

**One-step Facile transformation from rofecoxib to reversible  
mechanofluorochromism materials with bright dual-state  
emission**

Zhong Chen <sup>a,†</sup>, Zexin Wang <sup>a,b,†</sup>, Wei Liu <sup>a,†</sup>, Yongbo Wei <sup>a,b</sup>, Yuqiu Ye <sup>a</sup>, Yanbing Ke <sup>a</sup>, Tong  
Wu <sup>a</sup>, Nannan Chen <sup>a</sup>, Jingming Zhou<sup>a</sup>, Xiaopo Zhang <sup>c</sup>,Fengying Tan <sup>d</sup>, Hong Jiang <sup>\*,a</sup>, Xin  
Zhai <sup>\*,b</sup> and Lijun Xie <sup>\*,a</sup>

<sup>a</sup> Fujian Provincial Key Laboratory of Screening for Novel Microbial Products, Fujian Institute of  
Microbiology, Fuzhou, Fujian 350007, P. R. China

<sup>b</sup> Key Laboratory of Structure-based Drug Design and Discovery, Ministry of Education, School  
of Pharmaceutical Engineering, Shenyang Pharmaceutical University. Shenyang, Liaoning  
110016, P. R. China

<sup>c</sup> Key Laboratory of Tropical Translational Medicine of the Ministry of Education, Hainan Key  
Laboratory for Research and Development of Tropical Herbs, School of Pharmacy, Hainan  
Medical University, Haikou, Hainan 571199, P. R. China

<sup>d</sup> Hainan Provincial Key Laboratory for Research and Development of Tropical Herbs · School  
of Pharmacy, Hainan Medical University, Haikou, Hainan 571199, P. R. China

**\* Correspondence:**

Hong Jiang Email: Jianghong709@163.com

Xin Zhai Email: zhaixin\_syphu@126.com

Lijun Xie Email: [lijunxie8224@outlook.com](mailto:lijunxie8224@outlook.com)

† These authors contributed equally to this work.

## Table of Contents

| Section      | Title                                                                                | Page   |
|--------------|--------------------------------------------------------------------------------------|--------|
| Figure S1-S6 | Characterization of compounds                                                        | S1-6   |
| Figure S7    | Beer-Lambert's plot and linear of <b>NOR1</b> and <b>NOR2</b>                        | S6     |
| Figure S8    | Solvatochromism of <b>NOR1</b> and <b>NOR2</b>                                       | S6     |
| Table S1     | The photophysical data of <b>NOR1</b> and <b>NOR2</b> in different solvents          | S7     |
| Table S2     | DFT calculation data of <b>NOR1</b> and <b>NOR2</b>                                  | S8-12  |
| Table S3     | TDDFT calculations of <b>NOR1</b> and <b>NOR2</b>                                    | S12-25 |
| Figure S9    | Absorption spectra of <b>NOR1</b> and <b>NOR2</b> in DMSO/water mixtures             | S25    |
| Figure S10   | SEM images of <b>NOR1</b>                                                            | S26    |
| Table S4     | Molecular conformation of <b>NOR2</b>                                                | S26-27 |
| Figure S11   | Directions a, b, and c of <b>NOR2</b> crystal                                        | S27    |
| Figure S12   | Normalized solid-state PL spectra of <b>NOR2</b> in the pristine state, ground state | S28    |
| Figure S13   | Differential scanning calorimetry and powder X-ray diffraction of <b>NOR2</b>        | S28    |
| Figure S14   | Viscochromism of <b>NOR1</b>                                                         | S29    |
| Figure S15   | Cell viability assay of <b>NOR1</b>                                                  | S29    |

## Characterization of NOR1

**Synthesis of NOR1.** (General procedure) Piperidine, 2 drops, was added to a mixture of 0.140 g (0.0004 mol) of intermediate (Rofecoxib) and 0.140 g of 2-Morpholinobezaldehyde in 10 ml of MeOH, and the mixture was stirred at room temperature for 12 h in dark atmosphere. The mixture was then cooled, and the precipitate was filtered off and washed with MeOH. The yellow powder (**NOR1**, 0.13 g) was obtained with the yield 92%.  $^1\text{H}$  NMR (600 MHz,  $\text{DMSO-}d_6$ )  $\delta$  9.01 , 8.10 (d,  $J = 7.5$  Hz), 8.05 (d,  $J = 7.8$  Hz), 7.75 – 7.60 (m), 7.35 (dd,  $J = 8.7, 5.2$  Hz), 7.24 (d,  $J = 7.7$  Hz), 6.12 , 3.30 , 1.50 , 1.28 .  $^{13}\text{C}$  NMR (151 MHz,  $\text{DMSO-}d_6$ )  $\delta$  130.6, 116.6, 111.9, 110.1, 104.8, 100.3, 98.0, 93.3, 93.2, 92.6, 92.2, 92.1, 91.7, 91.5, 91.2, 90.5, 89.5, 88.8, 72.3, 42.0, 2.5, -8.9, -9.1. HRMS (ESI): calcd for  $\text{C}_{29}\text{H}_{27}\text{NO}_6\text{S}$ : 518.1632 ( $[\text{M}+\text{H}]^+$ ), found:406.2795.

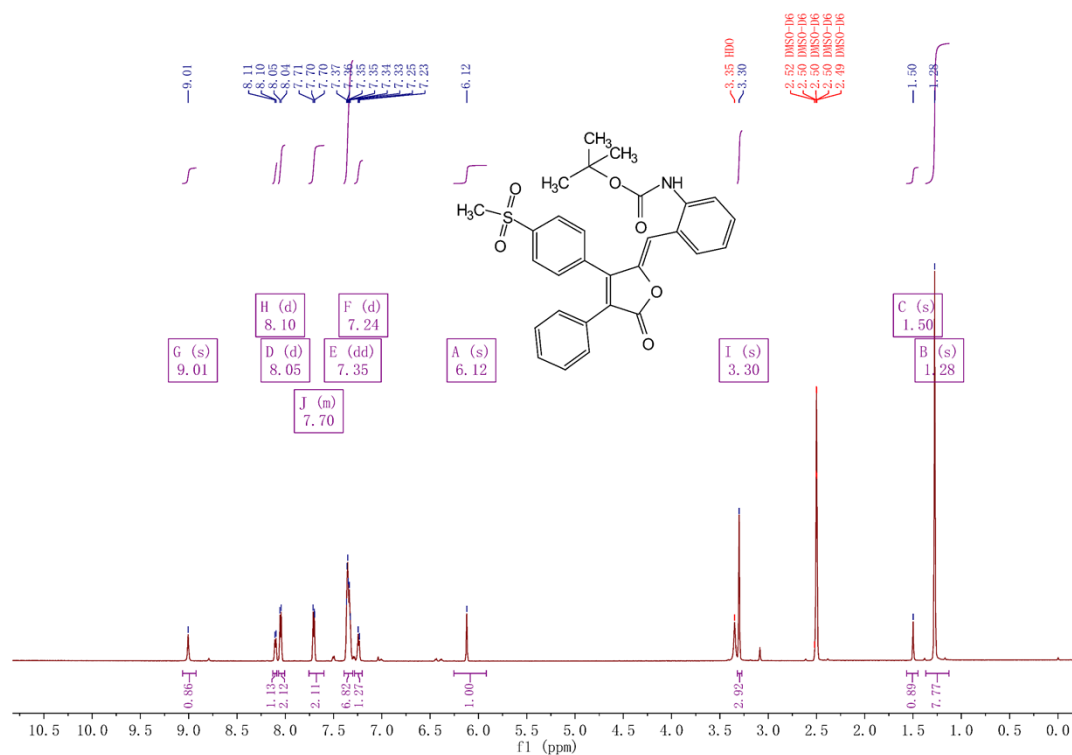

**Figure S1.**  $^1\text{H}$  NMR spectrum of **NOR1** in  $\text{DMSO-}d_6$  (600 MHz, 298K).



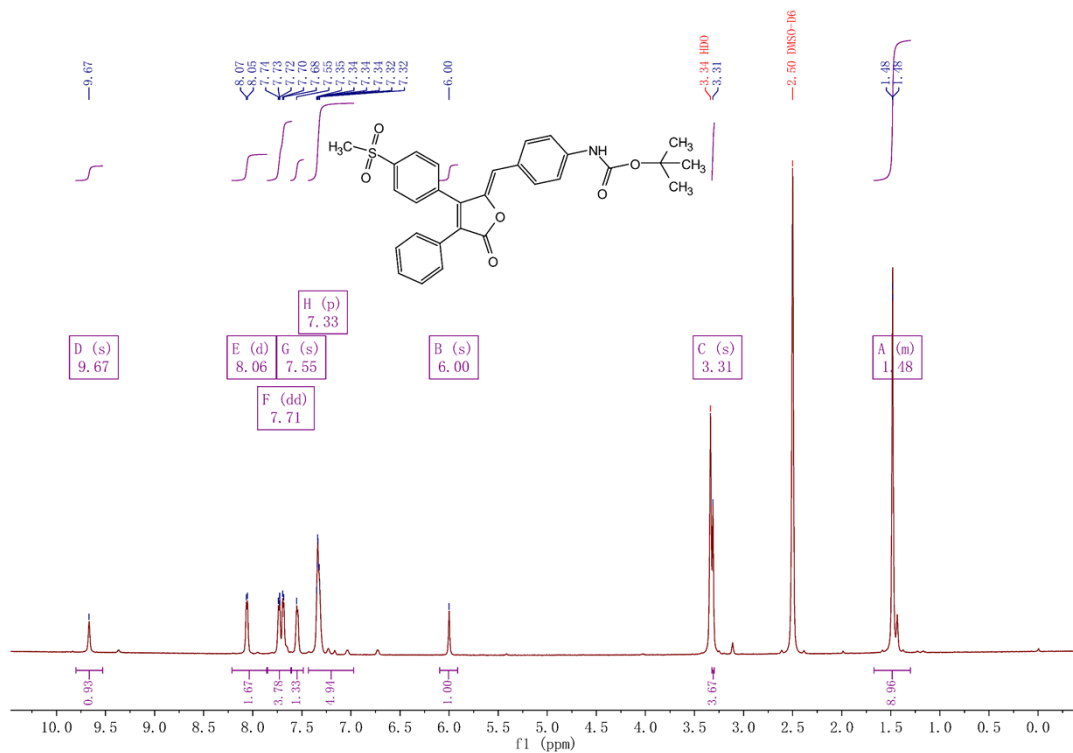

Figure S4. <sup>1</sup>H NMR spectrum of NOR2 in DMSO-*d*<sub>6</sub> (600 MHz, 298K).

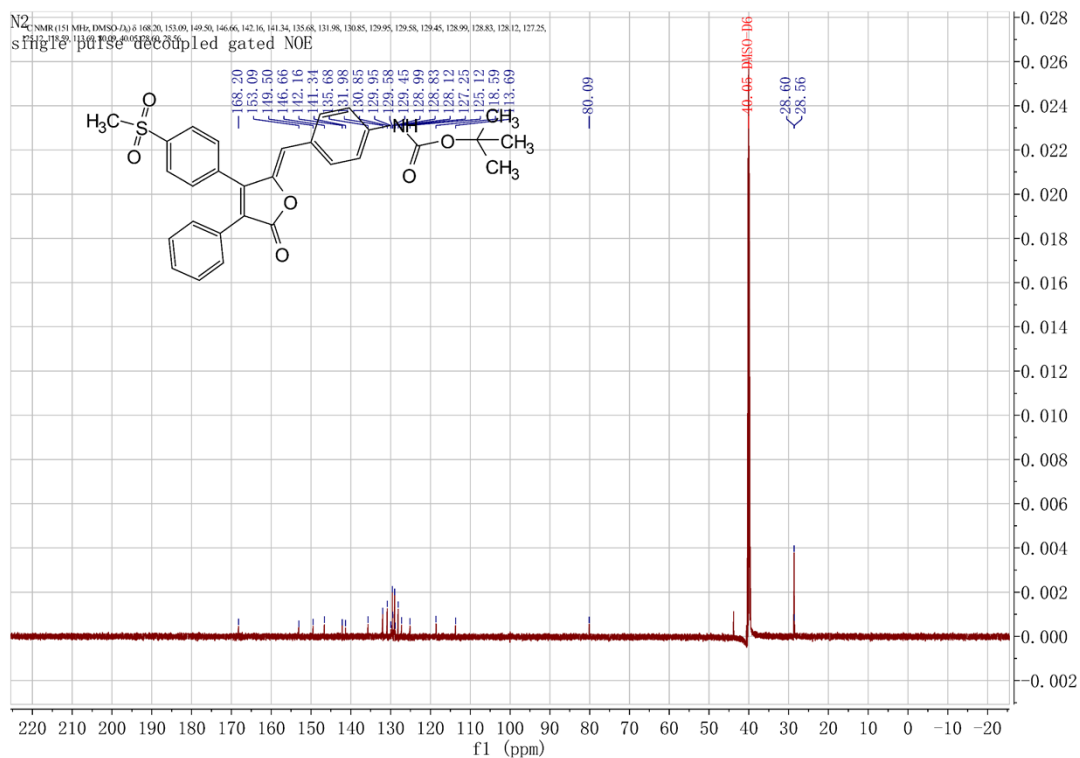

Figure S5. <sup>13</sup>C NMR spectrum of NOR2 in DMSO-*d*<sub>6</sub> (151 MHz, 298K).

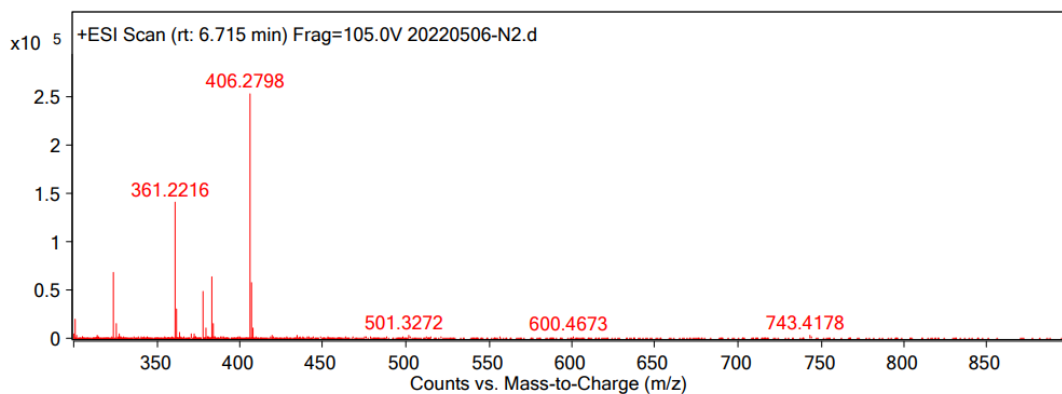

**Figure S6.** HRMS spectrum of **NOR2**

**Beer-Lambert's plot and linear fitting of NOR1 and NOR2**

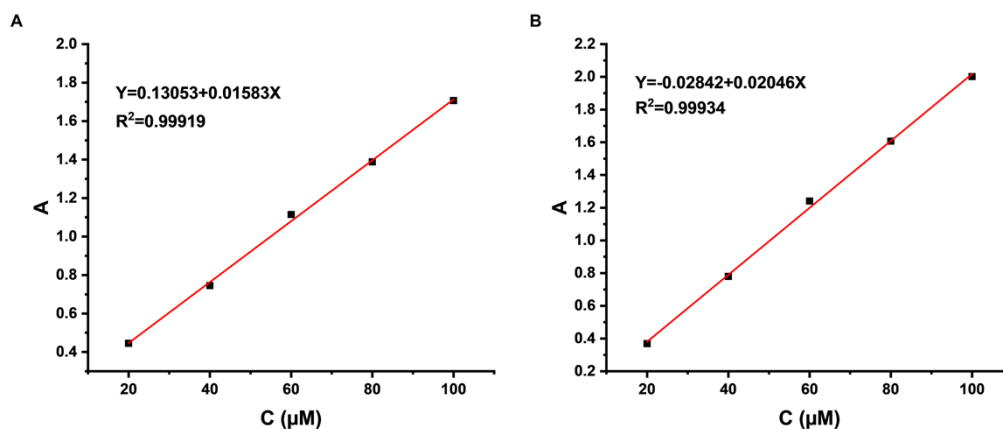

**Figure S7.** Beer-Lambert's plot and linear fitting of **NOR1** (A) and **NOR2** (B). ( $Y=0.13053+0.01583X$ ,  $R^2=0.99919$ ;  $Y=-0.02842+0.02046X$ ,  $R^2=0.99934$ ).

**Solvatochromism of NOR1 and NOR2**

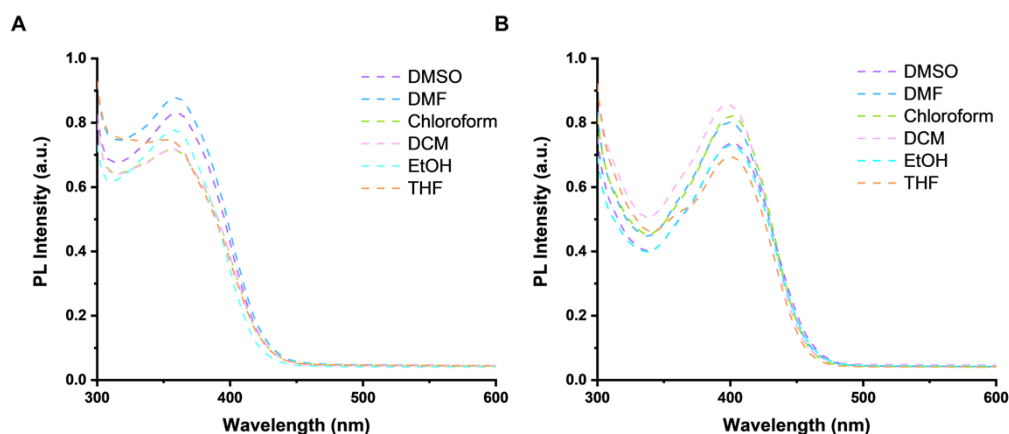

**Figure S8.** Normalized absorption of compounds (A) **NOR1**, (B) **NOR2** in various solvents at the concentration of 50  $\mu\text{M}$ , such as DMSO, DMF, chloroform, DCM, EtOH, THF, respectively.

**Table S1.** Photophysical data of **NOR1** and **NOR2** in various solvents.

| Compd.      | Solvents   | $\epsilon^a$ | $n^b$  | $\Delta f^c$ | $\lambda_{\text{abs}}^d$ | $\lambda_{\text{em}}^e$ | $\Delta\nu^f$ (cm <sup>-1</sup> ) |
|-------------|------------|--------------|--------|--------------|--------------------------|-------------------------|-----------------------------------|
|             |            |              |        |              | (nm)                     | (nm)                    |                                   |
| <b>NOR1</b> | Chloroform | 4.81         | 1.4459 | 0.148        | 356                      | 496                     | 7929                              |
|             | DCM        | 9.08         | 1.4244 | 0.217        | 356                      | 496                     | 7929                              |
|             | THF        | 7.58         | 1.4070 | 0.210        | 352                      | 490                     | 8001                              |
|             | EtOH       | 24.5         | 1.3611 | 0.2886       | 358                      | 522                     | 8776                              |
|             | DMF        | 37.6         | 1.3330 | 0.2742       | 360                      | 524                     | 8694                              |
|             | DMSO       | 48.9         | 1.4795 | 0.265        | 364                      | 526                     | 8461                              |
| <b>NOR2</b> | Chloroform | 4.81         | 1.4459 | 0.148        | 400                      | 510                     | 5392                              |
|             | DCM        | 9.08         | 1.4244 | 0.217        | 398                      | 518                     | 5821                              |
|             | THF        | 7.58         | 1.4070 | 0.210        | 400                      | 526                     | 5989                              |
|             | EtOH       | 24.5         | 1.3611 | 0.2886       | 400                      | 534                     | 6273                              |
|             | DMF        | 37.6         | 1.3330 | 0.2742       | 400                      | 534                     | 6273                              |
|             | DMSO       | 48.9         | 1.4795 | 0.265        | 402                      | 546                     | 6561                              |

<sup>a</sup> Static dielectric constant; <sup>b</sup> index of refraction; <sup>c</sup> orientation polarizability; <sup>d</sup> the maximum absorption wavelength; <sup>e</sup> the maximum emission wavelength; <sup>f</sup>  $\Delta\nu$  were calculated using the equation  $(1/\lambda_{\text{abs}} - 1/\lambda_{\text{em}}) \times 10^7$ .

The solvatochromic Lippert-Mataga equation:

$$\Delta\nu = \frac{1}{4\pi\epsilon_0 hca^3} 2\Delta\mu^2 \Delta f + \text{Const.}$$

(1)

Where

$$\Delta f = \frac{\epsilon - 1}{2\epsilon + 1} - \frac{n^2 - 1}{2n^2 - 1}$$

(2)

$$a = \left( \frac{3M}{4\pi dN_a} \right)^{1/3}$$

(3)

In the above equations,  $\Delta\nu$  is the Stokes shift,  $\epsilon_0$  is the vacuum permittivity,  $h$  is Planck's constant,  $c$  is the velocity of light,  $a$  is the Onsager radius of compound,  $\Delta\mu = \mu_e - \mu_g$  is the difference in the dipole moment of compound between the excited ( $\mu_e$ ) and the ground ( $\mu_g$ ) states,  $\epsilon$  and  $n$  are the static dielectric constant and the refractive index of the solvent, respectively,  $\Delta f$  is the orientation polarizability,  $M$  is the molecular weight,  $d$  is the density of molecule, and  $N_a$  is Avogadro's number

**Table S2. DFT calculation data of NOR1 and NOR2**

Calculation method: opt freq b3lyp/6-311g(d,p) scrf=(solvent=dms0) em=gd3 with Gaussian 09

Cartesian coordinates of optimized structure of **NOR1**

Total energy: -2026,151524 Hartrees

| Atom | X         | Y         | Z         |
|------|-----------|-----------|-----------|
| C    | -4.526651 | -0.952741 | 0.50385   |
| C    | -3.437461 | -1.254897 | 1.315814  |
| C    | -2.183615 | -0.764359 | 0.967243  |
| C    | -2.026623 | 0.026848  | -0.178362 |
| C    | -3.140368 | 0.321088  | -0.976822 |
| C    | -4.394645 | -0.171347 | -0.642305 |
| C    | -0.705105 | 0.568874  | -0.545434 |
| C    | -0.3723   | 1.873892  | -0.774401 |
| C    | 1.049032  | 1.904498  | -1.156842 |
| O    | 1.505604  | 0.582902  | -1.149672 |
| C    | 0.469227  | -0.254208 | -0.77632  |
| C    | -1.172403 | 3.096094  | -0.635077 |
| O    | 1.794593  | 2.804865  | -1.432808 |
| C    | -0.976475 | 4.173277  | -1.514481 |
| C    | -1.74098  | 5.330228  | -1.394794 |
| C    | -2.704484 | 5.435934  | -0.392546 |



---

|   |           |           |           |
|---|-----------|-----------|-----------|
| C | -2.896983 | 4.376655  | 0.495394  |
| C | -2.139011 | 3.217172  | 0.377039  |
| S | -6.149009 | -1.596757 | 0.943768  |
| O | -6.178343 | -1.798275 | 2.402138  |
| O | -7.166365 | -0.735893 | 0.317868  |
| C | 0.57576   | -1.59842  | -0.719045 |
| C | -6.205468 | -3.211533 | 0.150064  |
| C | 1.673251  | -2.536342 | -0.941173 |
| C | 1.277314  | -3.828238 | -1.353691 |
| C | 2.186047  | -4.847476 | -1.579032 |
| C | 3.54441   | -4.600128 | -1.376271 |
| C | 3.97314   | -3.349508 | -0.954308 |
| C | 3.062086  | -2.308149 | -0.72277  |
| N | 3.513418  | -1.062825 | -0.269299 |
| C | 4.62604   | -0.804093 | 0.494795  |
| O | 4.688053  | 0.530553  | 0.6794    |
| O | 5.40695   | -1.625779 | 0.932021  |
| C | 5.767794  | 1.164808  | 1.464717  |
| C | 5.39886   | 2.644508  | 1.380003  |
| C | 5.719305  | 0.6703    | 2.910769  |
| C | 7.1178    | 0.897364  | 0.798618  |
| H | -3.569147 | -1.848677 | 2.211021  |
| H | -1.329979 | -0.975826 | 1.598583  |
| H | -3.019514 | 0.938298  | -1.857853 |
| H | -5.260321 | 0.056282  | -1.250578 |
| H | -0.226258 | 4.099735  | -2.290657 |
| H | -1.583247 | 6.150017  | -2.086116 |
| H | -3.29739  | 6.338484  | -0.29963  |
| H | -3.635257 | 4.455798  | 1.284979  |

---

|   |           |           |           |
|---|-----------|-----------|-----------|
| H | -2.287375 | 2.406454  | 1.078885  |
| H | -0.370935 | -2.083903 | -0.510464 |
| H | -6.10545  | -3.073502 | -0.925103 |
| H | -5.396567 | -3.82101  | 0.54929   |
| H | -7.175487 | -3.642075 | 0.398292  |
| H | 0.219635  | -4.016197 | -1.500934 |
| H | 1.842626  | -5.822627 | -1.901985 |
| H | 4.275071  | -5.382175 | -1.547304 |
| H | 5.023086  | -3.166723 | -0.784153 |
| H | 2.971542  | -0.244672 | -0.516736 |
| H | 6.135375  | 3.244002  | 1.91895   |
| H | 5.373942  | 2.970864  | 0.338133  |
| H | 4.414827  | 2.817558  | 1.821161  |
| H | 6.42963   | 1.242835  | 3.512153  |
| H | 5.975943  | -0.385865 | 2.972703  |
| H | 4.719251  | 0.818751  | 3.325226  |
| H | 7.089133  | 1.212131  | -0.247312 |
| H | 7.893628  | 1.471875  | 1.310338  |
| H | 7.374536  | -0.159542 | 0.844546  |

Cartesian coordinates of optimized structure of **NOR2**

Total energy: -2026,154392 Hartrees

| Atom | X         | Y         | Z         |
|------|-----------|-----------|-----------|
| C    | -3.739045 | 2.694784  | -0.029331 |
| C    | -2.893836 | 2.327708  | -1.072322 |
| C    | -2.362783 | 1.042242  | -1.085672 |
| C    | -2.679797 | 0.133658  | -0.067435 |
| C    | -3.538071 | 0.526676  | 0.968918  |
| C    | -4.068734 | 1.809288  | 0.995063  |
| C    | -2.133403 | -1.236396 | -0.081374 |

---

|   |           |           |           |
|---|-----------|-----------|-----------|
| C | -2.82361  | -2.415551 | -0.018242 |
| C | -1.826744 | -3.499726 | -0.002023 |
| O | -0.568228 | -2.912944 | -0.068712 |
| C | -0.717307 | -1.539934 | -0.102184 |
| C | -4.268741 | -2.668264 | -0.01941  |
| O | -1.944145 | -4.697839 | 0.046603  |
| C | -4.802746 | -3.741225 | 0.713186  |
| C | -6.174789 | -3.975981 | 0.725352  |
| C | -7.036591 | -3.152231 | 0.002269  |
| C | -6.515439 | -2.092019 | -0.74063  |
| C | -5.145941 | -1.852172 | -0.753526 |
| S | -4.415802 | 4.361789  | 0.002655  |
| O | -4.443129 | 4.869743  | -1.379337 |
| O | -5.665634 | 4.332326  | 0.78075   |
| C | 0.333365  | -0.687509 | -0.101541 |
| C | -3.195445 | 5.30838   | 0.927449  |
| C | 1.754883  | -0.961098 | -0.097222 |
| C | 2.643719  | 0.131508  | -0.098181 |
| C | 4.020631  | -0.028627 | -0.092535 |
| C | 4.572118  | -1.31986  | -0.0833   |
| C | 3.695301  | -2.423001 | -0.085366 |
| C | 2.324636  | -2.252994 | -0.09255  |
| N | 5.941947  | -1.610517 | -0.080806 |
| C | 7.081712  | -0.82935  | -0.017738 |
| O | 6.808566  | 0.473676  | 0.054653  |
| O | 8.186228  | -1.339702 | -0.028722 |
| C | 7.884944  | 1.496861  | 0.12315   |
| C | 7.087061  | 2.7969    | 0.18507   |
| C | 8.704454  | 1.293966  | 1.396501  |

---

|   |           |           |           |
|---|-----------|-----------|-----------|
| C | 8.735472  | 1.433423  | -1.144149 |
| H | -2.668575 | 3.027909  | -1.866248 |
| H | -1.717893 | 0.736073  | -1.899616 |
| H | -3.789421 | -0.178019 | 1.7513    |
| H | -4.738366 | 2.115712  | 1.78814   |
| H | -4.13896  | -4.387642 | 1.27167   |
| H | -6.57085  | -4.804113 | 1.301941  |
| H | -8.104494 | -3.33752  | 0.012103  |
| H | -7.176353 | -1.453933 | -1.315943 |
| H | -4.751729 | -1.035942 | -1.345448 |
| H | 0.058169  | 0.361009  | -0.101505 |
| H | -2.246301 | 5.260022  | 0.39645   |
| H | -3.566446 | 6.332449  | 0.968539  |
| H | -3.113685 | 4.884723  | 1.926836  |
| H | 2.241759  | 1.139006  | -0.105082 |
| H | 4.663525  | 0.835286  | -0.095434 |
| H | 4.104834  | -3.427516 | -0.079705 |
| H | 1.686735  | -3.124312 | -0.092683 |
| H | 6.178542  | -2.592361 | -0.115278 |
| H | 7.770078  | 3.646683  | 0.242359  |
| H | 6.466134  | 2.907646  | -0.706521 |
| H | 6.441177  | 2.807447  | 1.065617  |
| H | 9.400519  | 2.128143  | 1.511712  |
| H | 9.270369  | 0.365196  | 1.355067  |
| H | 8.045454  | 1.272362  | 2.267654  |
| H | 8.10019   | 1.521169  | -2.028671 |
| H | 9.441705  | 2.267036  | -1.14303  |
| H | 9.292193  | 0.499666  | -1.196306 |

**Table S3. TDDFT calculations of NOR1 and NOR2**

## NOR1 absorbance prediction

# TD(nstates=20) 6-311g(d,p) scrf=(solvent=dms0) pbe1pbe

Excitation energies and oscillator strengths:

|               |           |           |           |           |          |              |
|---------------|-----------|-----------|-----------|-----------|----------|--------------|
| Excited State | 1:        | Singlet-A | 2.9675 eV | 417.81 nm | f=0.5566 | <S**2>=0.000 |
|               | 135 ->137 |           | -0.13533  |           |          |              |
|               | 136 ->137 |           | 0.69077   |           |          |              |

This state for optimization and/or second-order correction.

Total Energy, E(TD-HF/TD-KS) = -2023.94364915

Copying the excited state density for this state as the 1-particle RhoCI density.

|               |           |           |           |           |          |              |
|---------------|-----------|-----------|-----------|-----------|----------|--------------|
| Excited State | 2:        | Singlet-A | 3.4758 eV | 356.71 nm | f=0.3877 | <S**2>=0.000 |
|               | 135 ->137 |           | 0.68412   |           |          |              |
|               | 136 ->137 |           | 0.13315   |           |          |              |
| Excited State | 3:        | Singlet-A | 3.8775 eV | 319.75 nm | f=0.0730 | <S**2>=0.000 |
|               | 134 ->137 |           | 0.69007   |           |          |              |
| Excited State | 4:        | Singlet-A | 4.0110 eV | 309.11 nm | f=0.0164 | <S**2>=0.000 |
|               | 133 ->137 |           | 0.68830   |           |          |              |
| Excited State | 5:        | Singlet-A | 4.1382 eV | 299.61 nm | f=0.1623 | <S**2>=0.000 |
|               | 136 ->138 |           | 0.69025   |           |          |              |
| Excited State | 6:        | Singlet-A | 4.3252 eV | 286.66 nm | f=0.0469 | <S**2>=0.000 |
|               | 126 ->137 |           | 0.20013   |           |          |              |
|               | 127 ->137 |           | 0.20586   |           |          |              |
|               | 130 ->137 |           | 0.34144   |           |          |              |
|               | 131 ->137 |           | 0.36008   |           |          |              |
|               | 132 ->137 |           | 0.36659   |           |          |              |
| Excited State | 7:        | Singlet-A | 4.5122 eV | 274.78 nm | f=0.0071 | <S**2>=0.000 |
|               | 130 ->137 |           | -0.44455  |           |          |              |
|               | 131 ->137 |           | 0.51162   |           |          |              |
| Excited State | 8:        | Singlet-A | 4.6189 eV | 268.43 nm | f=0.0062 | <S**2>=0.000 |
|               | 130 ->137 |           | -0.25969  |           |          |              |

|               |           |           |           |           |          |              |
|---------------|-----------|-----------|-----------|-----------|----------|--------------|
|               | 131 ->137 | -0.26906  |           |           |          |              |
|               | 132 ->137 | 0.57837   |           |           |          |              |
| Excited State | 9:        | Singlet-A | 4.6480 eV | 266.75 nm | f=0.0144 | <S**2>=0.000 |
|               | 130 ->137 | 0.11832   |           |           |          |              |
|               | 135 ->138 | -0.12898  |           |           |          |              |
|               | 135 ->139 | 0.10998   |           |           |          |              |
|               | 136 ->139 | 0.66108   |           |           |          |              |
| Excited State | 10:       | Singlet-A | 4.7110 eV | 263.18 nm | f=0.0052 | <S**2>=0.000 |
|               | 126 ->137 | 0.18633   |           |           |          |              |
|               | 127 ->137 | 0.11052   |           |           |          |              |
|               | 129 ->137 | 0.14137   |           |           |          |              |
|               | 135 ->138 | 0.56653   |           |           |          |              |
|               | 136 ->139 | 0.14859   |           |           |          |              |
|               | 136 ->141 | 0.19616   |           |           |          |              |
| Excited State | 11:       | Singlet-A | 4.7735 eV | 259.73 nm | f=0.0467 | <S**2>=0.000 |
|               | 126 ->137 | 0.38080   |           |           |          |              |
|               | 127 ->137 | 0.30553   |           |           |          |              |
|               | 128 ->137 | 0.12177   |           |           |          |              |
|               | 129 ->137 | 0.17227   |           |           |          |              |
|               | 130 ->137 | -0.27103  |           |           |          |              |
|               | 131 ->137 | -0.10964  |           |           |          |              |
|               | 132 ->137 | -0.11083  |           |           |          |              |
|               | 135 ->138 | -0.27352  |           |           |          |              |
|               | 136 ->140 | 0.10490   |           |           |          |              |
| Excited State | 12:       | Singlet-A | 5.0011 eV | 247.91 nm | f=0.0757 | <S**2>=0.000 |
|               | 129 ->137 | 0.15712   |           |           |          |              |
|               | 134 ->138 | 0.25519   |           |           |          |              |
|               | 135 ->138 | -0.22277  |           |           |          |              |
|               | 135 ->143 | 0.11619   |           |           |          |              |
|               | 136 ->140 | 0.10172   |           |           |          |              |

|                   |           |           |           |          |              |  |
|-------------------|-----------|-----------|-----------|----------|--------------|--|
| 136 ->141         | 0.50109   |           |           |          |              |  |
| 136 ->143         | -0.16963  |           |           |          |              |  |
| Excited State 13: | Singlet-A | 5.0972 eV | 243.24 nm | f=0.1502 | <S**2>=0.000 |  |
| 134 ->138         | 0.14313   |           |           |          |              |  |
| 136 ->140         | 0.64352   |           |           |          |              |  |
| 136 ->141         | -0.13413  |           |           |          |              |  |
| Excited State 14: | Singlet-A | 5.1472 eV | 240.87 nm | f=0.0176 | <S**2>=0.000 |  |
| 127 ->137         | -0.24251  |           |           |          |              |  |
| 129 ->137         | 0.48984   |           |           |          |              |  |
| 134 ->138         | -0.14714  |           |           |          |              |  |
| 136 ->141         | -0.19981  |           |           |          |              |  |
| 136 ->142         | 0.11824   |           |           |          |              |  |
| 136 ->143         | -0.30388  |           |           |          |              |  |
| Excited State 15: | Singlet-A | 5.2238 eV | 237.35 nm | f=0.0654 | <S**2>=0.000 |  |
| 129 ->137         | -0.10524  |           |           |          |              |  |
| 131 ->138         | -0.13981  |           |           |          |              |  |
| 133 ->140         | -0.18728  |           |           |          |              |  |
| 134 ->138         | -0.14065  |           |           |          |              |  |
| 134 ->139         | 0.20005   |           |           |          |              |  |
| 135 ->139         | -0.36677  |           |           |          |              |  |
| 135 ->142         | 0.11210   |           |           |          |              |  |
| 136 ->139         | 0.10490   |           |           |          |              |  |
| 136 ->141         | 0.13759   |           |           |          |              |  |
| 136 ->142         | 0.37363   |           |           |          |              |  |
| Excited State 16: | Singlet-A | 5.2385 eV | 236.68 nm | f=0.0398 | <S**2>=0.000 |  |
| 131 ->138         | 0.14921   |           |           |          |              |  |
| 133 ->138         | -0.18375  |           |           |          |              |  |
| 133 ->140         | -0.14107  |           |           |          |              |  |
| 134 ->138         | 0.39484   |           |           |          |              |  |
| 135 ->139         | 0.10495   |           |           |          |              |  |

|                   |           |           |           |          |              |  |
|-------------------|-----------|-----------|-----------|----------|--------------|--|
| 135 ->142         | 0.13621   |           |           |          |              |  |
| 136 ->140         | -0.12669  |           |           |          |              |  |
| 136 ->141         | -0.15038  |           |           |          |              |  |
| 136 ->142         | 0.35714   |           |           |          |              |  |
| Excited State 17: | Singlet-A | 5.2706 eV | 235.24 nm | f=0.0008 | <S**2>=0.000 |  |
| 127 ->137         | -0.18447  |           |           |          |              |  |
| 128 ->137         | 0.65151   |           |           |          |              |  |
| 129 ->137         | -0.12255  |           |           |          |              |  |
| Excited State 18: | Singlet-A | 5.2906 eV | 234.35 nm | f=0.0088 | <S**2>=0.000 |  |
| 126 ->137         | 0.15255   |           |           |          |              |  |
| 127 ->137         | -0.10357  |           |           |          |              |  |
| 128 ->137         | -0.17626  |           |           |          |              |  |
| 129 ->137         | -0.11541  |           |           |          |              |  |
| 134 ->138         | -0.36926  |           |           |          |              |  |
| 135 ->139         | 0.39359   |           |           |          |              |  |
| 136 ->142         | 0.20379   |           |           |          |              |  |
| Excited State 19: | Singlet-A | 5.3369 eV | 232.32 nm | f=0.0186 | <S**2>=0.000 |  |
| 126 ->137         | 0.45535   |           |           |          |              |  |
| 127 ->137         | -0.38974  |           |           |          |              |  |
| 129 ->137         | -0.16126  |           |           |          |              |  |
| 134 ->138         | 0.18381   |           |           |          |              |  |
| 135 ->139         | -0.13305  |           |           |          |              |  |
| Excited State 20: | Singlet-A | 5.3902 eV | 230.02 nm | f=0.0136 | <S**2>=0.000 |  |
| 133 ->138         | 0.62954   |           |           |          |              |  |
| 135 ->139         | 0.19100   |           |           |          |              |  |
| 136 ->142         | 0.16209   |           |           |          |              |  |

### NOR2 absorbance prediction

# TD(nstates=20) 6-311g(d,p) scrf=(solvent=dms0) pbe1pbe

Excitation energies and oscillator strengths:



Excited State 1: Singlet-A 2.9201 eV 424.58 nm f=1.3016 <S\*\*2>=0.000  
136 ->137 0.70494

This state for optimization and/or second-order correction.

Total Energy, E(TD-HF/TD-KS) = -2023.94986945

Copying the excited state density for this state as the 1-particle RhoCl density.

Excited State 2: Singlet-A 3.7568 eV 330.03 nm f=0.1082 <S\*\*2>=0.000  
132 ->137 0.10799

135 ->137 0.68964

Excited State 3: Singlet-A 3.9270 eV 315.72 nm f=0.2333 <S\*\*2>=0.000  
136 ->138 0.69903

Excited State 4: Singlet-A 4.0650 eV 305.01 nm f=0.0140 <S\*\*2>=0.000  
134 ->137 0.68530

Excited State 5: Singlet-A 4.2184 eV 293.91 nm f=0.0033 <S\*\*2>=0.000  
133 ->137 0.64970

136 ->141 -0.23530

Excited State 6: Singlet-A 4.3123 eV 287.51 nm f=0.0213 <S\*\*2>=0.000  
128 ->137 0.32148

130 ->137 0.20693

131 ->137 0.55889

Excited State 7: Singlet-A 4.4203 eV 280.49 nm f=0.0172 <S\*\*2>=0.000  
136 ->139 0.69639

Excited State 8: Singlet-A 4.5714 eV 271.22 nm f=0.0221 <S\*\*2>=0.000  
130 ->137 0.45771

131 ->137 -0.22023

132 ->137 0.46100

Excited State 9: Singlet-A 4.6589 eV 266.12 nm f=0.0357 <S\*\*2>=0.000  
128 ->137 -0.27870

130 ->137 -0.31846

131 ->137 0.25822

|                   |           |           |           |          |              |
|-------------------|-----------|-----------|-----------|----------|--------------|
| 132 ->137         | 0.44161   |           |           |          |              |
| 136 ->143         | 0.12155   |           |           |          |              |
| Excited State 10: | Singlet-A | 4.7910 eV | 258.78 nm | f=0.0674 | <S**2>=0.000 |
| 127 ->137         | 0.11505   |           |           |          |              |
| 128 ->137         | 0.39310   |           |           |          |              |
| 130 ->137         | -0.29357  |           |           |          |              |
| 131 ->137         | -0.13088  |           |           |          |              |
| 132 ->137         | 0.19120   |           |           |          |              |
| 133 ->137         | -0.10948  |           |           |          |              |
| 136 ->140         | 0.36348   |           |           |          |              |
| 136 ->141         | -0.10299  |           |           |          |              |
| 136 ->143         | 0.10870   |           |           |          |              |
| Excited State 11: | Singlet-A | 4.8226 eV | 257.09 nm | f=0.0223 | <S**2>=0.000 |
| 128 ->137         | 0.24601   |           |           |          |              |
| 130 ->137         | -0.15715  |           |           |          |              |
| 131 ->137         | -0.10853  |           |           |          |              |
| 133 ->137         | 0.22718   |           |           |          |              |
| 136 ->140         | -0.31588  |           |           |          |              |
| 136 ->141         | 0.44929   |           |           |          |              |
| Excited State 12: | Singlet-A | 4.9043 eV | 252.81 nm | f=0.0209 | <S**2>=0.000 |
| 135 ->138         | 0.46837   |           |           |          |              |
| 136 ->140         | -0.34739  |           |           |          |              |
| 136 ->141         | -0.35055  |           |           |          |              |
| Excited State 13: | Singlet-A | 5.0128 eV | 247.34 nm | f=0.0855 | <S**2>=0.000 |
| 128 ->137         | -0.17190  |           |           |          |              |
| 131 ->137         | 0.13889   |           |           |          |              |
| 135 ->138         | 0.49263   |           |           |          |              |
| 136 ->140         | 0.32727   |           |           |          |              |
| 136 ->141         | 0.25493   |           |           |          |              |
| Excited State 14: | Singlet-A | 5.0290 eV | 246.54 nm | f=0.0002 | <S**2>=0.000 |

|                   |           |           |           |          |              |  |
|-------------------|-----------|-----------|-----------|----------|--------------|--|
|                   | 129 ->137 | 0.69355   |           |          |              |  |
| Excited State 15: | Singlet-A | 5.0715 eV | 244.47 nm | f=0.0202 | <S**2>=0.000 |  |
|                   | 134 ->140 | -0.16486  |           |          |              |  |
|                   | 135 ->142 | 0.15785   |           |          |              |  |
|                   | 136 ->142 | 0.64708   |           |          |              |  |
| Excited State 16: | Singlet-A | 5.2666 eV | 235.42 nm | f=0.0149 | <S**2>=0.000 |  |
|                   | 130 ->137 | 0.11633   |           |          |              |  |
|                   | 130 ->138 | -0.27772  |           |          |              |  |
|                   | 131 ->138 | 0.14896   |           |          |              |  |
|                   | 131 ->139 | 0.17812   |           |          |              |  |
|                   | 132 ->138 | -0.15050  |           |          |              |  |
|                   | 134 ->138 | -0.25796  |           |          |              |  |
|                   | 135 ->139 | 0.45757   |           |          |              |  |
|                   | 136 ->143 | 0.16037   |           |          |              |  |
| Excited State 17: | Singlet-A | 5.2735 eV | 235.11 nm | f=0.1910 | <S**2>=0.000 |  |
|                   | 124 ->137 | -0.10768  |           |          |              |  |
|                   | 132 ->137 | -0.14600  |           |          |              |  |
|                   | 135 ->139 | -0.12856  |           |          |              |  |
|                   | 136 ->143 | 0.63072   |           |          |              |  |
| Excited State 18: | Singlet-A | 5.3924 eV | 229.92 nm | f=0.0015 | <S**2>=0.000 |  |
|                   | 127 ->137 | 0.12934   |           |          |              |  |
|                   | 134 ->138 | 0.62293   |           |          |              |  |
|                   | 135 ->139 | 0.24602   |           |          |              |  |
|                   | 136 ->142 | 0.10684   |           |          |              |  |
| Excited State 19: | Singlet-A | 5.4086 eV | 229.24 nm | f=0.0070 | <S**2>=0.000 |  |
|                   | 127 ->137 | 0.63381   |           |          |              |  |
|                   | 127 ->138 | 0.15578   |           |          |              |  |
|                   | 128 ->137 | -0.17581  |           |          |              |  |
|                   | 134 ->138 | -0.13010  |           |          |              |  |
| Excited State 20: | Singlet-A | 5.6105 eV | 220.98 nm | f=0.0324 | <S**2>=0.000 |  |

|           |          |
|-----------|----------|
| 130 ->138 | 0.30590  |
| 131 ->138 | -0.17187 |
| 131 ->139 | -0.25299 |
| 132 ->138 | 0.20914  |
| 134 ->138 | -0.13021 |
| 134 ->140 | 0.18104  |
| 135 ->139 | 0.35041  |
| 135 ->142 | -0.17711 |
| 136 ->142 | 0.13112  |

### NOR1 emission prediction

Calculation method: TD opt 6-311g(d,p) scrf=(solvent=dms) pbe1pbe with Gaussian 09

Cartesian coordinates of optimized structure of **NOR1**

| Atom | X           | Y           | Z           |
|------|-------------|-------------|-------------|
| C    | -4.73084184 | -0.83046697 | 0.20368912  |
| C    | -3.75562278 | -1.33691406 | 1.05815162  |
| C    | -2.45740198 | -0.86629754 | 0.95512737  |
| C    | -2.11395558 | 0.10806126  | 0.00250742  |
| C    | -3.12470168 | 0.60748023  | -0.8392046  |
| C    | -4.42318065 | 0.14177357  | -0.74554111 |
| C    | -0.7482587  | 0.59901019  | -0.12404938 |
| C    | -0.30911751 | 1.930333    | -0.32632571 |
| C    | 1.11784055  | 1.8841076   | -0.5319212  |
| O    | 1.49873174  | 0.52413975  | -0.44194981 |
| C    | 0.39586181  | -0.24047272 | -0.22603237 |
| C    | -1.02212445 | 3.1778685   | -0.2041852  |
| O    | 1.97653073  | 2.71116987  | -0.70943535 |
| C    | -0.54790465 | 4.34638257  | -0.84294952 |
| C    | -1.21820267 | 5.54938666  | -0.71253353 |
| C    | -2.37520963 | 5.63593069  | 0.06149933  |

---

|   |             |             |             |
|---|-------------|-------------|-------------|
| C | -2.85164944 | 4.49729988  | 0.70990245  |
| C | -2.19324579 | 3.2874979   | 0.57982118  |
| S | -6.3932751  | -1.43920457 | 0.32174806  |
| O | -6.59781311 | -1.94909514 | 1.67924075  |
| O | -7.29587315 | -0.40494185 | -0.18825194 |
| C | 0.44519316  | -1.6291614  | -0.23534945 |
| C | -6.45036094 | -2.82170059 | -0.79883217 |
| C | 1.453532    | -2.63371929 | -0.32249865 |
| C | 0.94622199  | -3.9531752  | -0.47160832 |
| C | 1.74830025  | -5.06385737 | -0.54937009 |
| C | 3.14429881  | -4.91920567 | -0.47476865 |
| C | 3.7020816   | -3.67065309 | -0.31891991 |
| C | 2.90313885  | -2.51505367 | -0.2360034  |
| N | 3.46727052  | -1.28267478 | -0.06411732 |
| C | 4.79564805  | -0.96072611 | 0.19262395  |
| O | 4.87396473  | 0.36564427  | 0.22328335  |
| O | 5.69554023  | -1.74725402 | 0.36183267  |
| C | 6.14850162  | 1.05765245  | 0.48047075  |
| C | 5.74578329  | 2.52044448  | 0.41008232  |
| C | 6.65504156  | 0.69930205  | 1.86899441  |
| C | 7.14805892  | 0.71746219  | -0.61416068 |
| H | -4.01879021 | -2.07057685 | 1.81136461  |
| H | -1.70498323 | -1.23141813 | 1.64526882  |
| H | -2.87855771 | 1.3582317   | -1.58121266 |
| H | -5.19728631 | 0.53048537  | -1.39723497 |
| H | 0.34946673  | 4.29063652  | -1.44573747 |
| H | -0.83989661 | 6.42967233  | -1.22182166 |
| H | -2.89778135 | 6.58120716  | 0.16144009  |
| H | -3.74124995 | 4.55746273  | 1.32821644  |

---

|   |             |             |             |
|---|-------------|-------------|-------------|
| H | -2.56548753 | 2.42078454  | 1.1119106   |
| H | -0.55168125 | -2.05422462 | -0.19773415 |
| H | -6.23003169 | -2.46985111 | -1.80612276 |
| H | -5.72556051 | -3.56756148 | -0.47461622 |
| H | -7.46374833 | -3.22231828 | -0.74525082 |
| H | -0.13037115 | -4.07024066 | -0.528934   |
| H | 1.30448391  | -6.04562438 | -0.66869178 |
| H | 3.78887729  | -5.78834845 | -0.54144612 |
| H | 4.77296781  | -3.55434351 | -0.25076911 |
| H | 2.86614302  | -0.46414568 | -0.15772225 |
| H | 6.6190165   | 3.15104572  | 0.5915669   |
| H | 5.34001377  | 2.75957246  | -0.57551018 |
| H | 4.98810364  | 2.74723286  | 1.16386568  |
| H | 7.52882295  | 1.31447321  | 2.09878502  |
| H | 6.94252848  | -0.35016282 | 1.93044267  |
| H | 5.88622672  | 0.90595919  | 2.61828461  |
| H | 6.72403982  | 0.93858238  | -1.59727894 |
| H | 8.0418921   | 1.33260931  | -0.48251231 |
| H | 7.43935633  | -0.33198324 | -0.57715081 |

Excitation energies and oscillator strengths:

Excited State 1: Singlet-A 2.3052 eV 537.85 nm f=0.9614 <S\*\*2>=0.000  
136 ->137 -0.70355

This state for optimization and/or second-order correction.

Total Energy, E(TD-HF/TD-KS) = -2023.95917681

Copying the excited state density for this state as the 1-particle RhoCI density.

Excited State 2: Singlet-A 2.9899 eV 414.68 nm f=0.3565 <S\*\*2>=0.000  
135 ->137 -0.69850

Excited State 3: Singlet-A 3.4265 eV 361.84 nm f=0.1352 <S\*\*2>=0.000  
134 ->137 -0.69823

**NOR2 emission prediction**

Calculation method: TD opt 6-311g(d,p) scrf=(solvent=dms0) pbe1pbe with Gaussian 09

Cartesian coordinates of optimized structure of **NOR2**

| Atom | X           | Y           | Z           |
|------|-------------|-------------|-------------|
| C    | 3.7603324   | 2.74900689  | 0.04863332  |
| C    | 2.75434277  | 2.43787234  | 0.9611619   |
| C    | 2.23040819  | 1.15737244  | 0.97903446  |
| C    | 2.69575633  | 0.16834616  | 0.0927408   |
| C    | 3.72188679  | 0.51216012  | -0.80937439 |
| C    | 4.24710453  | 1.79002422  | -0.83830733 |
| C    | 2.1408932   | -1.17505471 | 0.09654682  |
| C    | 2.80951576  | -2.41210545 | -0.07465776 |
| C    | 1.7880555   | -3.43653323 | -0.14652198 |
| O    | 0.54552079  | -2.8029021  | -0.00332085 |
| C    | 0.74587819  | -1.46526354 | 0.10299075  |
| C    | 4.21212081  | -2.7307987  | -0.0179306  |
| O    | 1.81555392  | -4.63838607 | -0.25446809 |
| C    | 4.71164649  | -3.91333994 | -0.61207948 |
| C    | 6.05626206  | -4.22989643 | -0.54372094 |
| C    | 6.94968322  | -3.39146288 | 0.12363078  |
| C    | 6.47463906  | -2.22853148 | 0.72886987  |
| C    | 5.13345041  | -1.89731121 | 0.65859133  |
| S    | 4.42491303  | 4.3902347   | 0.0073964   |
| O    | 4.23740606  | 4.99500022  | 1.32833622  |
| O    | 5.77672476  | 4.32291023  | -0.5530465  |
| C    | -0.33751532 | -0.59139034 | 0.10248397  |
| C    | 3.39660285  | 5.27085669  | -1.14935482 |
| C    | -1.71956995 | -0.88890495 | 0.10266028  |
| C    | -2.63906881 | 0.19896824  | 0.04272746  |
| C    | -3.99794128 | 0.02275139  | 0.04110496  |

---

|   |             |             |             |
|---|-------------|-------------|-------------|
| C | -4.53510405 | -1.28298939 | 0.1039744   |
| C | -3.64040627 | -2.37819545 | 0.1709789   |
| C | -2.28400063 | -2.19751116 | 0.17079071  |
| N | -5.87400701 | -1.58682354 | 0.11029355  |
| C | -7.03610464 | -0.82554922 | 0.04596731  |
| O | -6.79460836 | 0.46786299  | -0.04732106 |
| O | -8.11291425 | -1.37616193 | 0.07697943  |
| C | -7.89831076 | 1.4493131   | -0.12572423 |
| C | -7.15510089 | 2.7708586   | -0.21491896 |
| C | -8.71403944 | 1.19915773  | -1.38366675 |
| C | -8.73403636 | 1.38027893  | 1.14182518  |
| H | 2.40833837  | 3.18523897  | 1.66595666  |
| H | 1.47654251  | 0.90574855  | 1.71659737  |
| H | 4.09372887  | -0.23269924 | -1.50327933 |
| H | 5.03436739  | 2.04697863  | -1.53785453 |
| H | 4.02618111  | -4.57137357 | -1.13046559 |
| H | 6.41621832  | -5.13712583 | -1.01798254 |
| H | 8.00345351  | -3.64373438 | 0.17488227  |
| H | 7.15791606  | -1.57851997 | 1.26559712  |
| H | 4.7803764   | -1.00242032 | 1.15606607  |
| H | -0.07390414 | 0.4597324   | 0.0863652   |
| H | 2.37104188  | 5.2692579   | -0.78184898 |
| H | 3.78563555  | 6.28899627  | -1.19857588 |
| H | 3.46682115  | 4.78581095  | -2.12230765 |
| H | -2.24324406 | 1.20828258  | -0.00540293 |
| H | -4.65713787 | 0.87528154  | -0.00722506 |
| H | -4.04553358 | -3.38401372 | 0.22441368  |
| H | -1.63366142 | -3.05884881 | 0.22368117  |
| H | -6.09939439 | -2.57103629 | 0.1713875   |

---



|   |             |            |             |
|---|-------------|------------|-------------|
| H | -7.87432172 | 3.59043053 | -0.27814334 |
| H | -6.53218211 | 2.92451997 | 0.6697115   |
| H | -6.52020371 | 2.79796806 | -1.10393926 |
| H | -9.43901735 | 2.00838101 | -1.50287857 |
| H | -9.25244697 | 0.2534087  | -1.32798379 |
| H | -8.06405145 | 1.1920332  | -2.26264056 |
| H | -8.10064586 | 1.51236208 | 2.02300476  |
| H | -9.46862276 | 2.18949323 | 1.12593452  |
| H | -9.26255754 | 0.43049808 | 1.21852415  |

Excitation energies and oscillator strengths:

Excited State 1: Singlet-A 2.2524 eV 550.45 nm f=1.4546  $\langle S^{*2} \rangle = 0.000$   
 136 ->137 0.70642

This state for optimization and/or second-order correction.

Total Energy, E(TD-HF/TD-KS) = -2023.96594272

Copying the excited state density for this state as the 1-particle RhoCI density.

Excited State 2: Singlet-A 3.1971 eV 387.81 nm f=0.2295  $\langle S^{*2} \rangle = 0.000$   
 135 ->137 0.69766

Excited State 3: Singlet-A 3.6028 eV 344.13 nm f=0.3203  $\langle S^{*2} \rangle = 0.000$   
 136 ->138 0.70123

### Absorption spectra of NOR1 and NOR2 in DMSO/water mixtures

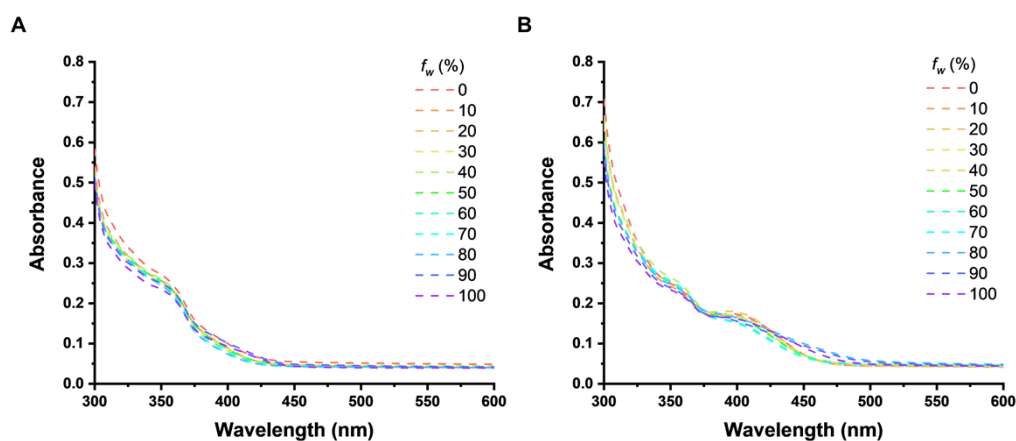

**Figure S9.** Absorption spectra of (A) **NOR1**, (B) **NOR2** in DMSO/water mixtures with varied  $f_w$ .

**SEM images of NOR1**

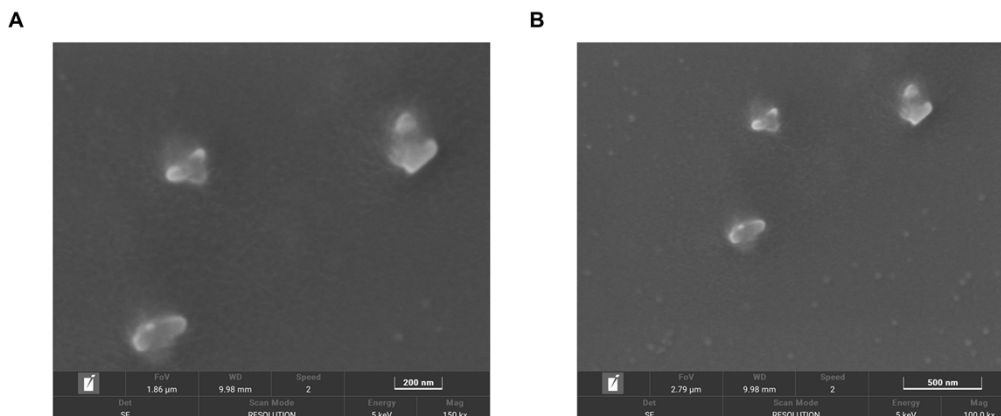

**Figure S10** (A) SEM images of **NOR1** at 90 vol % of water in DMSO/water mixture, scale bare 200 nm. (B) SEM images of **NOR1** at 90 vol % of water in DMSO/water mixture, scale bare 500 nm.

**Molecular conformation of NOR2**

**Table S4.** Crystal data and structure refinement for **NOR2**

|                        |                     |
|------------------------|---------------------|
| Identification code    | <b>NOR2</b>         |
| Empirical formula      | $C_{29}H_{27}NO_6S$ |
| Formula weight         | 517.57              |
| Temperature/K          | 301.2(3)            |
| Crystal system         | monoclinic          |
| Space group            | $C2/c$              |
| $a/\text{\AA}$         | 17.5736(14)         |
| $b/\text{\AA}$         | 13.0560(9)          |
| $c/\text{\AA}$         | 24.5284(18)         |
| $\alpha/^\circ$        | 90                  |
| $\beta/^\circ$         | 103.023(8)          |
| $\gamma/^\circ$        | 90                  |
| Volume/ $\text{\AA}^3$ | 5483.1(7)           |

|                                                |                                          |
|------------------------------------------------|------------------------------------------|
| Z                                              | 8                                        |
| $\rho_{\text{calc}}/\text{cm}^3$               | 1.254                                    |
| $\mu/\text{mm}^{-1}$                           | 0.160                                    |
| F(000)                                         | 2176.0                                   |
| Crystal size/ $\text{mm}^3$                    | 0.3 × 0.26 × 0.25                        |
| Radiation                                      | MoK $\alpha$ ( $\lambda = 0.71073$ )     |
| 2 $\theta$ range for data collection/ $^\circ$ | 4.058 to 50                              |
| Index ranges                                   | -17 ≤ h ≤ 20, -15 ≤ k ≤ 15, -29 ≤ l ≤ 29 |
| Reflections collected                          | 17466                                    |
| Independent reflections                        | 4714 [Rint = 0.0730, Rsigma = 0.0604]    |
| Data/restraints/parameters                     | 4714/60/342                              |
| Goodness-of-fit on F <sup>2</sup>              | 1.037                                    |
| Final R indexes [ $l >= 2\sigma(l)$ ]          | R1 = 0.0667, wR2 = 0.1539                |
| Final R indexes [all data]                     | R1 = 0.1086, wR2 = 0.1767                |
| Largest diff. peak/hole / e Å <sup>-3</sup>    | 0.46/-0.19                               |

### Directions a, b, and c of **NOR2** crystal

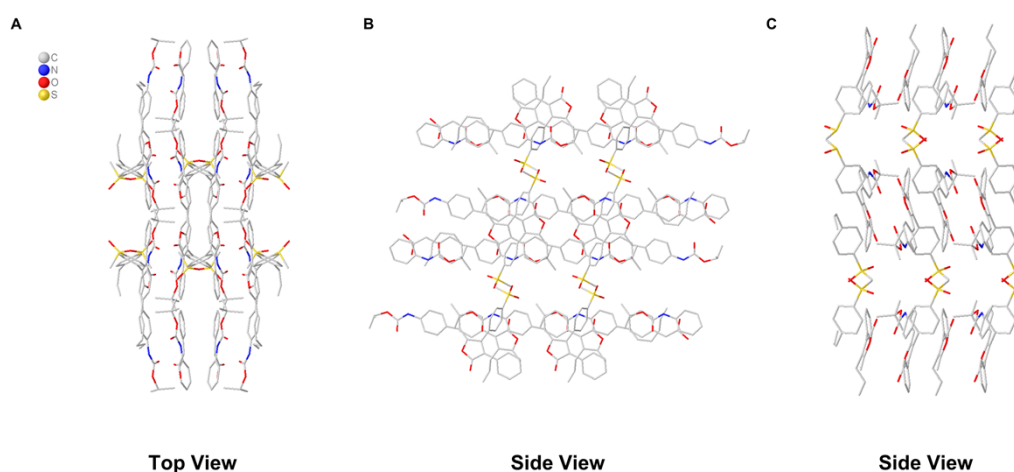

**Figure S11.** (A) Top view and (B-C) side view of packing structure of **NOR2** crystal.

Normalized solid-state PL spectra of NOR2 in the pristine state, ground state

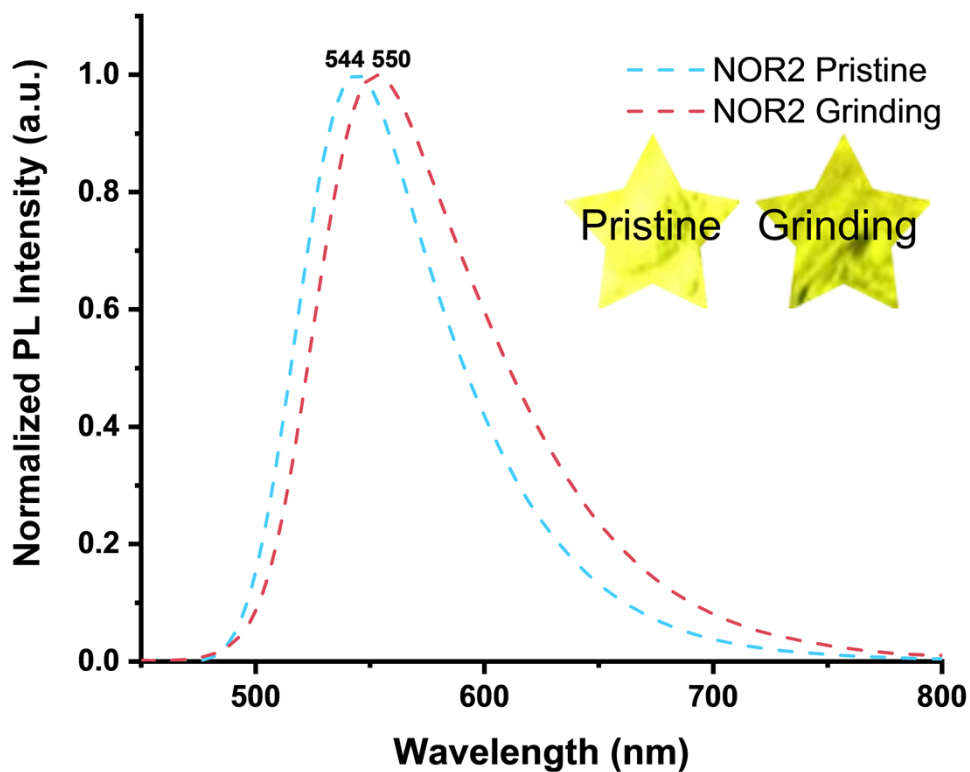

Figure S12. PL spectra of pristine and grinding powders of NOR2

Differential scanning calorimetry and powder X-ray diffraction of NOR2

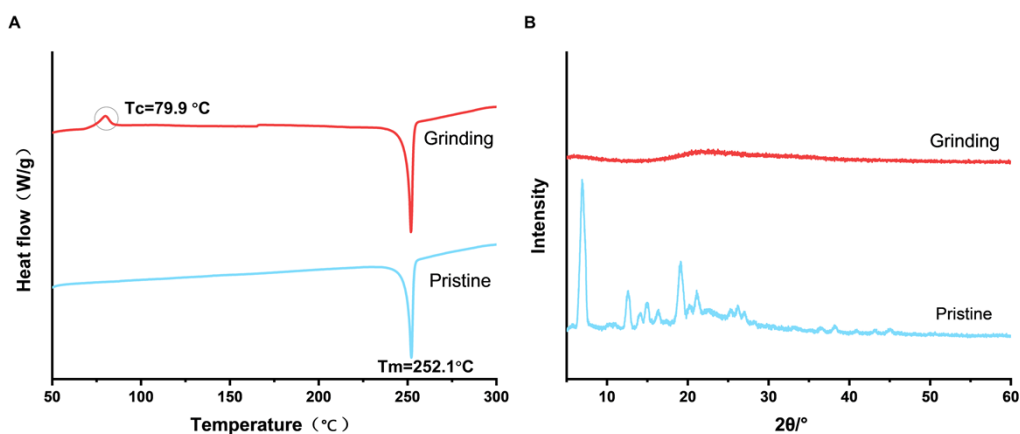

Figure S13. (A) DSC of NOR2 in different states: pristine (black line), grinding (red line), immersing with acetone (blue line) and heating (green line). (B) PXRD of NOR2 in different states: pristine (black line), grinding (red line).

## Viscochromism of NOR1

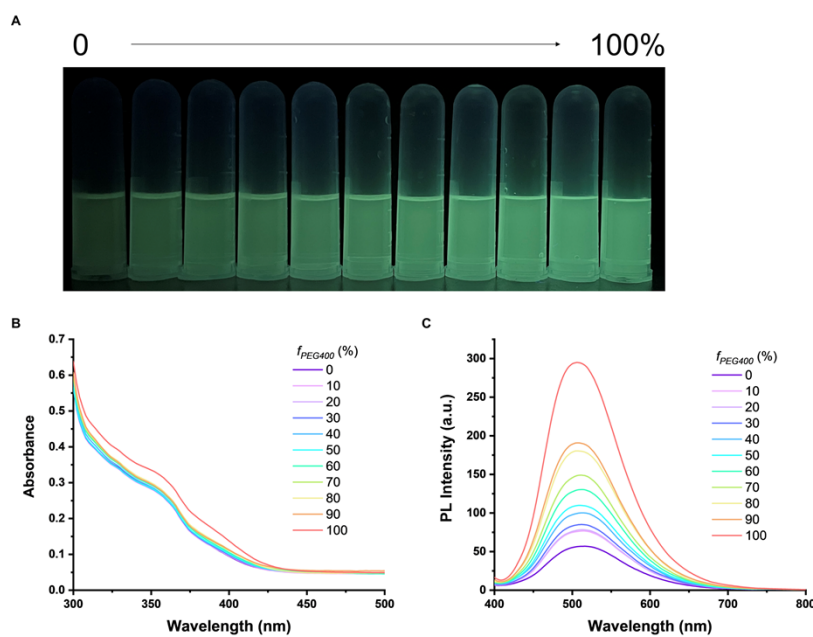

**Figure S14.** (A) Naked eye visualization of **NOR1** under UV light with increasing volume fractions of PEG400 at the concentration of 10  $\mu\text{M}$ . (B) Absorbance and (C) PL spectra of **NOR1** at the concentration of 10  $\mu\text{M}$  in ethanol-PEG400 mixtures with different volume fractions of PEG400.

## Cell viability assay of NOR1

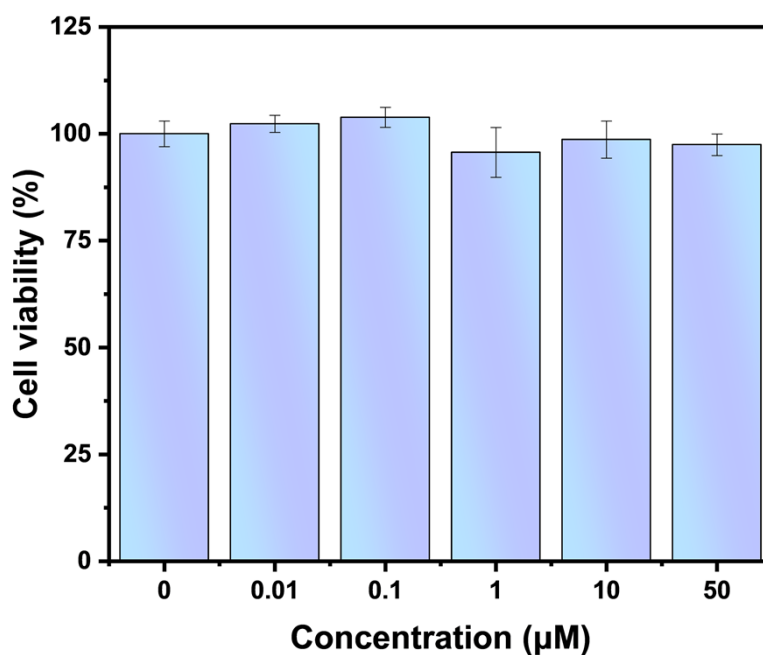

**Figure S15.** Cell viability values (%) estimated by CCK8 assays using HeLa cells, cultured in the presence of 0-50.0  $\mu\text{M}$  of **NOR1** for 24 h at 37  $^{\circ}\text{C}$
